# Supplementary material for: Molecular mobility of amorphous N-acetyl-α-methylbenzylamine and Debye relaxation evidenced by dielectric relaxation spectroscopy and molecular dynamics simulations
Source: Royal Society of Chemistry journal article supplement (doi:10.1039/c8cp04880k), 2018-12-03
Supplement: c8cp04880k1.pdf [file c8cp04880k1.pdf]

## SUPPLEMENTARY MATERIAL:

### **Molecular Mobility of Amorphous N-Acetyl- $\alpha$ -Methylbenzylamine and Debye Relaxation evidenced by Dielectric Relaxation Spectroscopy and Molecular Dynamic Simulations**

Bienvenu Atawa †§, Natália T. Correia‡, Nicolas Couvrat §, Frédéric Affouard‡\*,  
Gérard Coquerel §, Eric Dargent †, Allisson Saiter †

† Normandie Univ, UNIROUEN, INSA Rouen, CNRS, GPM, 76000 Rouen, France

§ Normandie Univ, UNIROUEN, SMS, 76000 Rouen, France

‡ Univ Lille, CNRS, UMR 8207, UMET, Unité Matériaux et Transformations, F59000  
Villeneuve d'Ascq, France

### **Fitting analysis of secondary relaxations detected in Nac-MBA**

Figure S1 shows illustrative examples ( $T = 203$  K and  $T = 232$  K) of the fitting procedure used for a semi-quantitative analysis of Nac-MBA dielectric spectra. For the  $\beta$ -relaxation,  $\alpha_{HN}$  slightly increases from 0.38 up to 0.45 as temperature increases from 222 K up to 240 K. For temperatures  $T > T_g$ , the  $\beta$ -process becomes broader and progressively get out of the investigated frequency range.

In the case of the secondary  $\gamma$ -process a value of  $\alpha_{HN} = 0.14 \pm 0.02$  is obtained. This value seems compatible with the broadness nature expressed by experimental features (see figure 6 and 8 of main text) and was kept constant in all the temperature region for which it was possible to follow the  $\gamma$ -trace in the available frequency region (from 153 K to 238 K).

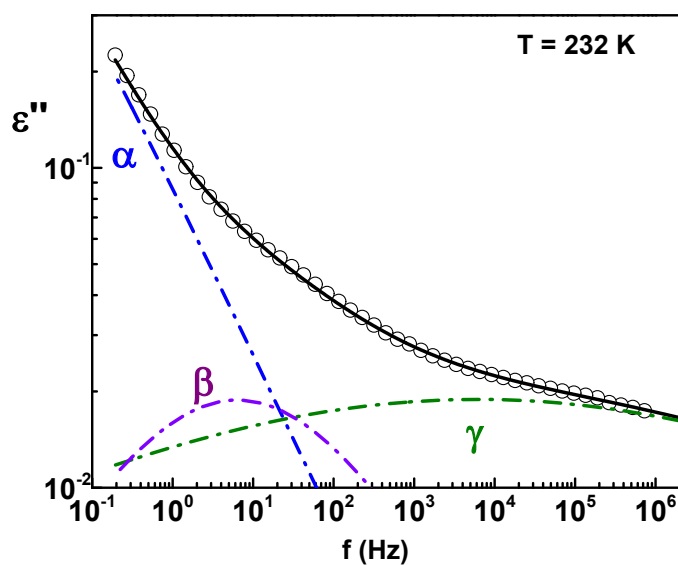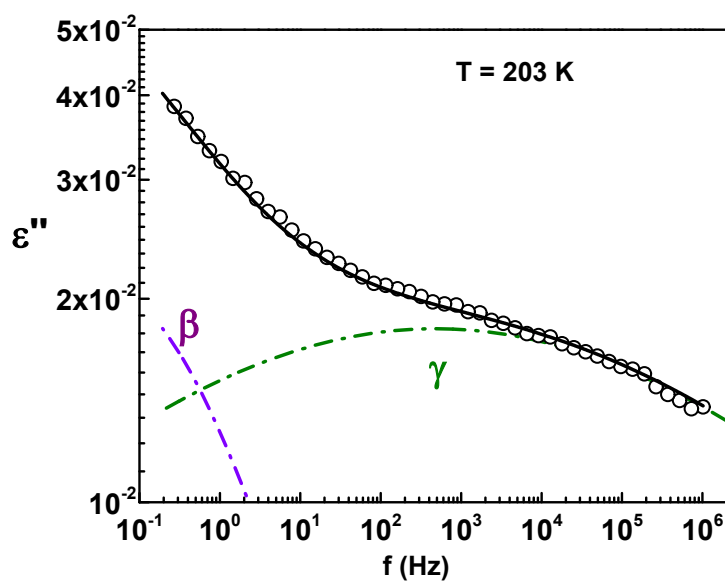

Figure S1: Fitting procedure of the dielectric loss peak in the glassy state at indicated temperatures (232 K and 203 K). The dash-dot lines represent the individual fitting functions (Cole-Cole for the secondary and  $\alpha$ -relaxation and Debye for the D-process). Solid lines are the total fit functions (see main text for details).
